# Supplementary material for: Genomic insights into the host specific adaptation of the Pneumocystis genus
Source: PubMed Central journal article supplement (PMC7940399; doi:10.1038/s42003-021-01799-7), 2021-03-08
Supplement: 42003_2021_1799_MOESM2_ESM.pdf [file 42003_2021_1799_MOESM2_ESM.pdf]

## **Description of Additional Supplementary Files**

**File name:** Supplementary Data 1

**Description:** Annotation of *Pneumocystis macacae* genome subtelomeric regions.  
*Pneumocystis jirovecii* genome-wide signatures of selection

**File name:** Supplementary Data 2

**Description:** *Pneumocystis jirovecii* genome-wide signatures of selection.
